# Supplementary material for: Flexural properties of 3D printed continuous flax fiber reinforced polyethylene composites
Source: PeerJ journal article supplement (doi:10.7717/peerj-matsci.34), 2025-04-24
Supplement: supplementary_files_2.xlsx [file supplementary_files_2.xlsx]

## Sheet: Sheet1
Melt flow index								Melt flow index								Melt flow index
Temperature/ ℃	140							Temperature/ ℃	150							Temperature/ ℃	160
Weight/ g	0.259	0.279	0.272	0.274	0.272			Weight/ g	0.351	0.351	0.352	0.35	0.352			Weight/ g	0.461	0.44	0.435	0.452	0.458
MFI/ g/10min	16.26							MFI/ g/10min	21.06							MFI/ g/10min	26.94
