# Supplementary material for: Flexural properties of 3D printed continuous flax fiber reinforced polyethylene composites
Source: PeerJ journal article supplement (doi:10.7717/peerj-matsci.34), 2025-04-24
Supplement: supplementary_files_3.xlsx [file supplementary_files_3.xlsx]

## Sheet: Sheet1
Prepreg filament tensile strength
Temperature/℃	Tensile strength/MPa			Average value/MPa		Standard deviation/MPa
155Pure	6.9532	7.7378	7.1166	7.2692		0.41396
140-145	10.5302	10.0166	10.3917	10.3128		0.26573
145-150	11.2878	10.8872	11.3387	11.1712		0.24729
150-155	12.4737	12.2258	12.5437	12.4144		0.16704
155-160	11.3587	10.8354	10.8912	11.0284		0.28738
